# Supplementary material for: Technical note: Wellbore water volume computation of tracer test in numerical modelling in a confined aquifer
Source: Copernicus journal article supplement (doi:10.5194/hess-2023-229), 2023-11-27
Supplement: Supplementary file [file hess-2023-229-AC1-supplement.pdf]

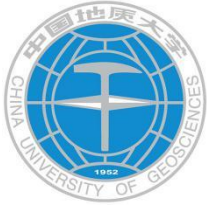

**CHINA UNIVERSITY OF GEOSCIENCES**  
**SCHOOL OF ENVIROMENTAL STUDIES**  
WUHAN, HUBEI, CHINA 430074

Dr. Quanrong Wang, Endowed CUG Scholar in Hydrogeology  
Tel: +86 15927169156  
Email: wangqr@cug.edu.cn

January 8, 2023

1  
2  
3  
4  

---

5  
6  
7  
8  
9  
10  
11  
12  
13  
14  
15  
16  
17  
18  
19  
20  
21  
22  
23  
24  
25  
26  
27  
28  
29  
30

Memorandum

To: Dr. Zhongbo YU, Editor of Hydrology and Earth System Sciences

Subject: Revision of Paper # hess-2023-229

Dear Editor:

Upon your recommendation, we have carefully revised Paper # hess-2023-229 entitled "Technical note: Wellbore water volume computation of tracer test in numerical modelling in a confined aquifer".

**Response to Reviewer 1:**

My comments are as follows:

1. The proposed new mathematical model is valuable and can be considered as a technical note (after a major revision!)

[Reply: Thanks a lot. We have made reversion considering all comments by reviewers.](#)

2. The writing of the paper is very poor, not only in the language but also in the logic and organization. The entire paper must be rewritten.

[Reply: We have rewritten the manuscript. English speaker, Dr. Hafizou Mohammed Sow, helped us for checking the English](#)

3. The motivation must be rewritten. The problem in the previous study should be clearly stated and its potential error should be quantified.

[Reply: The motivation has been rewritten.](#)

4. The paper may be too long for a technical note.

[Reply: We have deleted the discussions.](#)

5. The bottom line is that it is very difficult to review the paper and judge its merit because it is poorly written with a lot of confusing sentences.

[Reply: We have revised it.](#)

31

32

---

33 If you have any further questions about this revision, please contact me.

34 Sincerely Yours,

35 Quanrong Wang, PhD, PG.

36 Professor and

37 Holder of Endowed CUG Scholar in Hydrogeology

A handwritten signature in black ink that reads "Quanrong Wang". The signature is written in a cursive, flowing style with a large initial 'Q'.
